# Supplementary material for: HyperCys: A Structure- and Sequence-Based Predictor of Hyper-Reactive Druggable Cysteines
Source: MDPI journal article supplement (doi:10.3390/ijms24065960), 2023-03-22
Supplement: s1 [file s1]

**Table S1.** The hyperparameter values of the ML models.

| Model | Hyperparameters    | Search Domain                   | Final Setting |
|-------|--------------------|---------------------------------|---------------|
| KNN   | n_neighbors        | Range (1, 100)                  | 9             |
| SVM   | C                  | [0.1, 1, 10, 20, 100, 1000]     | 100           |
|       | kernel             | ['rbf', 'poly', 'sigmoid']      | sigmoid       |
|       | gamma              | [1, 0.1, 0.01, 0.001, 0.0001]   | 0.001         |
| LGBM  | n_estimators       | [100, 200, 300, 400, 700, 1000] | 100           |
|       | colsample_bytree   | [0.1, 0.3, 0.5, 0.7, 0.8]       | 0.3           |
|       | max_depth          | [15, 20, 25, 50, 70, 90]        | 15            |
|       | num_leaves         | [50, 100, 200]                  | 50            |
| MLP   | hidden_layer_sizes | [(50,50,50), (50,100,50)]       | (50, 50, 50)  |
|       | solver             | ['sgd', 'adam']                 | adam          |
|       | alpha              | [0.00001,0.0001,10,100,1000]    | 10            |
|       | learning_rate      | ['constant','adaptive']         | adaptive      |
| RF    | n_estimators       | [10, 80, 100]                   | 80            |
|       | criterion          | ['gini', 'entropy']             | gini          |
|       | max_depth          | [10,500,1000,3000]              | 3000          |
|       | min_samples_split  | [2, 3, 4]                       | 4             |
| LR    | C                  | [0.001, 0.01, 0.1, 1, 10, 100]  | 0.1           |

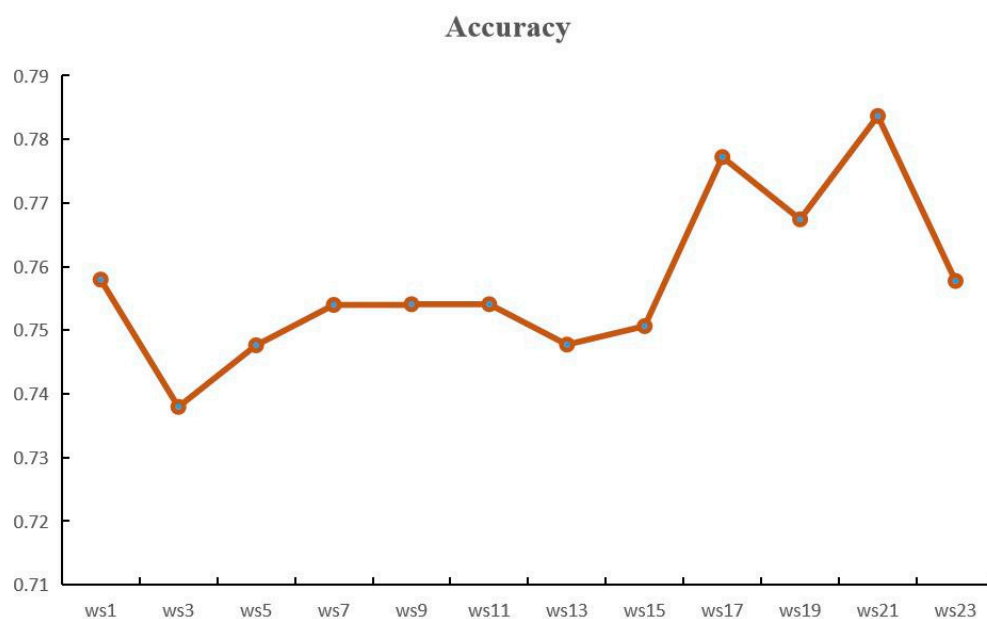

**Figure S1.** Performance comparisons of the HyperCys model trained using feature vectors created by applying a sliding window of different sizes. The accuracies of the model for various window sizes are reported.

**Table S2.** Performance of the HyperCys model with different window sizes.

| Model           | ACC   | F1    | RECALL | ROC AUC |
|-----------------|-------|-------|--------|---------|
| ws1             | 0.758 | 0.721 | 0.692  | 0.818   |
| ws3             | 0.738 | 0.713 | 0.647  | 0.798   |
| ws5             | 0.748 | 0.695 | 0.654  | 0.805   |
| ws7             | 0.754 | 0.713 | 0.675  | 0.812   |
| ws9             | 0.754 | 0.715 | 0.661  | 0.809   |
| ws11            | 0.754 | 0.721 | 0.675  | 0.805   |
| ws13            | 0.748 | 0.701 | 0.631  | 0.806   |
| ws15            | 0.751 | 0.709 | 0.675  | 0.812   |
| ws17            | 0.777 | 0.741 | 0.721  | 0.807   |
| ws19            | 0.767 | 0.732 | 0.699  | 0.824   |
| ws21 (the best) | 0.784 | 0.754 | 0.742  | 0.824   |

---

|      |       |       |       |       |
|------|-------|-------|-------|-------|
| ws23 | 0.758 | 0.726 | 0.698 | 0.812 |
|------|-------|-------|-------|-------|

---
